# Supplementary material
Source: MDPI journal article supplement (https://www.mdpi.com/2073-4441/12/1/226)
Supplement: s1 [file s1]

| description         | year | month | $P$ (mm) | $T$ (°C) | $\delta^{18}\text{O}$<br>(‰) | $\delta^2\text{H}$<br>(‰) | $d$ -excess<br>(‰) | $A$ ( $^3\text{H}$ )<br>(TU) |
|---------------------|------|-------|----------|----------|------------------------------|---------------------------|--------------------|------------------------------|
|                     | 1976 | 1     | 25       | 2.4      |                              |                           |                    | 50.0                         |
| location 1          | 1976 | 2     | 31       | 1.3      |                              |                           |                    | 36.8                         |
|                     | 1976 | 3     | 46       | 3.3      |                              |                           |                    | 71.3                         |
| Zagreb              | 1976 | 4     | 101      | 11.4     |                              |                           |                    | 89.9                         |
| stable isotopes     | 1976 | 5     | 54       | 16       |                              |                           |                    | 165.8                        |
| until 1995          | 1976 | 6     | 81       | 18.7     |                              |                           |                    | 187.9                        |
| tritium until 1993  | 1976 | 7     | 113      | 21.4     |                              |                           |                    | 119.2                        |
| Puntijarka for 1995 | 1976 | 8     | 64       | 17.2     |                              |                           |                    | 300.0                        |
|                     | 1976 | 9     | 101      | 15.3     |                              |                           |                    | 45.5                         |
|                     | 1976 | 10    | 91       | 11       |                              |                           |                    | 32.6                         |
| Zagreb - Grič       | 1976 | 11    | 92       | 7.9      |                              |                           |                    | 40.1                         |
| stable isotopes     | 1976 | 12    | 109      | 1.4      |                              |                           |                    | 67.1                         |
| and tritium         | 1977 | 1     | 82       | 2.9      |                              |                           |                    | 24.5                         |
| after 1996          | 1977 | 2     | 74       | 5.9      |                              |                           |                    | 19.3                         |
|                     | 1977 | 3     | 56       | 10.3     |                              |                           |                    | 73.0                         |
|                     | 1977 | 4     | 93       | 9.7      |                              |                           |                    |                              |
|                     | 1977 | 5     | 20       | 16       |                              |                           |                    | 136.2                        |
|                     | 1977 | 6     | 52       | 19.5     |                              |                           |                    | 174.1                        |
|                     | 1977 | 7     | 137      | 20.1     |                              |                           |                    | 120.6                        |
|                     | 1977 | 8     | 134      | 19.7     |                              |                           |                    |                              |
|                     | 1977 | 9     | 83       | 14.5     |                              |                           |                    | 72.8                         |
|                     | 1977 | 10    | 65       | 12.2     |                              |                           |                    | 59.0                         |
|                     | 1977 | 11    | 167      | 6.2      |                              |                           |                    | 39.8                         |
|                     | 1977 | 12    | 51       | 0.2      |                              |                           |                    | 74.2                         |
|                     | 1978 | 1     | 47       | 0.8      |                              |                           |                    | 37.7                         |
|                     | 1978 | 2     | 43       | 1.4      |                              |                           |                    | 70.6                         |
|                     | 1978 | 3     | 71       | 7.7      |                              |                           |                    | 82.9                         |
|                     | 1978 | 4     | 49       | 9.8      |                              |                           |                    | 99.2                         |
|                     | 1978 | 5     | 115      | 13.4     |                              |                           |                    | 121.2                        |
|                     | 1978 | 6     | 61       | 18.2     |                              |                           |                    | 94.4                         |
|                     | 1978 | 7     | 106      | 18.9     |                              |                           |                    | 102.2                        |
|                     | 1978 | 8     | 76       | 18.1     |                              |                           |                    | 86.6                         |
|                     | 1978 | 9     | 72       | 15       |                              |                           |                    | 86.2                         |
|                     | 1978 | 10    | 51       | 10.4     |                              |                           |                    | 36.4                         |
|                     | 1978 | 11    | 15       | 1.6      |                              |                           |                    | 37.7                         |
|                     | 1978 | 12    | 52       | 1.7      |                              |                           |                    | 31.1                         |
|                     | 1979 | 1     | 108      | -1.1     |                              |                           |                    | 29.5                         |
|                     | 1979 | 2     | 22       | 2.5      |                              |                           |                    | 32.5                         |
|                     | 1979 | 3     | 79       | 8.2      |                              |                           |                    | 31.6                         |
|                     | 1979 | 4     | 51       | 10.1     |                              |                           |                    | 32.2                         |
|                     | 1979 | 5     | 1        | 16.5     |                              |                           |                    |                              |
|                     | 1979 | 6     | 103      | 20.9     |                              |                           |                    | 68.0                         |
|                     | 1979 | 7     | 119      | 19.1     |                              |                           |                    | 56.1                         |
|                     | 1979 | 8     | 43       | 19.1     |                              |                           |                    | 56.1                         |
|                     | 1979 | 9     | 47       | 16.1     |                              |                           |                    | 27.7                         |
|                     | 1979 | 10    | 67       | 9.8      |                              |                           |                    | 26.0                         |
|                     | 1979 | 11    | 85       | 6.2      |                              |                           |                    | 24.2                         |
|                     | 1979 | 12    | 67       | 4.6      |                              |                           |                    | 20.3                         |
|                     | 1980 | 1     | 56       | -1.5     | -13.56                       | -99                       | 9.48               | 14.8                         |
|                     | 1980 | 2     | 28       | 3.2      | -8.13                        | -58.4                     | 6.64               | 38.6                         |

|      |    |     |      |        |       |       |      |
|------|----|-----|------|--------|-------|-------|------|
| 1980 | 3  | 57  | 5.2  | -10.11 | -76.1 | 4.78  | 76.0 |
| 1980 | 4  | 70  | 7.7  | -10.66 | -79.2 | 7.92  | 37.1 |
| 1980 | 5  | 68  | 12.7 | -9.17  | -65.4 | 7.96  | 56.7 |
| 1980 | 6  | 42  | 18   | -5.73  | -39.3 | 6.54  | 63.1 |
| 1980 | 7  | 97  | 19   | -6.74  | -48.8 | 5.12  | 50.1 |
| 1980 | 8  | 76  | 20   | -4.32  | -24.7 | 9.86  | 43.3 |
| 1980 | 9  | 72  | 15.9 | -8.19  | -59.6 | 5.92  | 40.3 |
| 1980 | 10 | 158 | 10.6 | -7.62  | -46.8 | 14.16 | 21.6 |
| 1980 | 11 | 134 | 4.3  | -10.65 | -75.4 | 9.8   | 14.5 |
| 1980 | 12 | 73  | 0    | -12.73 | -92.7 | 9.14  | 17.6 |
| 1981 | 1  | 34  | -0.8 | -12.71 | -98.3 | 3.38  | 31.3 |
| 1981 | 2  | 65  | 1.7  | -12.52 | -92.6 | 7.56  | 34.1 |
| 1981 | 3  | 55  | 10.1 | -12.26 | -90   | 8.08  | 40.4 |
| 1981 | 4  | 53  | 12.1 | -7.20  | -47.3 | 10.3  | 51.5 |
| 1981 | 5  | 105 | 16   | -7.42  | -50.7 | 8.66  | 62.2 |
| 1981 | 6  | 130 | 19.7 | -8.80  | -60.7 | 9.7   | 66.4 |
| 1981 | 7  | 27  | 21.2 | -4.31  | -27   | 7.48  | 42.8 |
| 1981 | 8  | 45  | 20.8 | -7.63  | -50.6 | 10.44 | 45.4 |
| 1981 | 9  | 127 | 17.3 | -7.26  | -50   | 8.08  | 31.1 |
| 1981 | 10 | 52  | 13.5 | -7.87  | -50.7 | 12.26 | 17.9 |
| 1981 | 11 | 47  | 6.2  | -11.81 | -85.8 | 8.68  | 19.5 |
| 1981 | 12 | 131 | 1.9  | -12.60 | -96   | 4.8   | 17.1 |
| 1982 | 1  | 18  | -0.9 |        |       |       |      |
| 1982 | 2  | 5   | 0.7  |        |       |       |      |
| 1982 | 3  | 47  | 6.9  | -8.29  | -55.9 | 10.42 | 17.8 |
| 1982 | 4  | 50  | 9.4  | -9.08  | -63.9 | 8.74  | 31.2 |
| 1982 | 5  | 52  | 17   | -6.04  | -40.3 | 8.02  | 24.7 |
| 1982 | 6  | 102 | 20.6 | -3.71  | -31   | -1.32 | 32.2 |
| 1982 | 7  | 54  | 22.2 | -10.94 | -75.4 | 12.12 | 45.9 |
| 1982 | 8  | 110 | 20.7 | -6.79  | -50.4 | 3.92  | 34.2 |
| 1982 | 9  | 67  | 19.5 | -5.25  | -29.3 | 12.7  | 23.2 |
| 1982 | 10 | 126 | 12.5 | -9.37  | -64.7 | 10.26 | 18.8 |
| 1982 | 11 | 39  | 7.1  | -13.29 | -96.3 | 10.02 | 10.2 |
| 1982 | 12 | 135 | 5.1  | -13.07 | -97   | 7.56  | 12.3 |
| 1983 | 1  | 29  | 4.3  | -8.73  | -60   | 9.84  | 12.7 |
| 1983 | 2  | 99  | 0.7  | -13.90 | -98.5 | 12.7  | 33.5 |
| 1983 | 3  | 84  | 8.7  | -11.67 | -84.1 | 9.26  | 19.6 |
| 1983 | 4  | 17  | 14.1 | -4.44  | -37.2 | -1.68 | 22.2 |
| 1983 | 5  | 84  | 17.8 | -7.34  | -49.8 | 8.92  | 22.3 |
| 1983 | 6  | 97  | 19.3 | -8.21  | -63.2 | 2.48  | 36.6 |
| 1983 | 7  | 26  | 23.8 | -3.92  | -31   | 0.36  | 38.1 |
| 1983 | 8  | 88  | 21.5 | -6.24  | -43.9 | 6.02  | 35.1 |
| 1983 | 9  | 78  | 17.2 | -8.63  | -63.2 | 5.84  | 24.5 |
| 1983 | 10 | 87  | 12   | -9.20  | -66.1 | 7.5   | 24.7 |
| 1983 | 11 | 26  | 3.7  | -7.21  | -49.1 | 8.58  |      |
| 1983 | 12 | 40  | 2.1  | -10.96 | -77.8 | 9.88  | 14.3 |
| 1984 | 1  | 150 | 1.5  | -13.71 | -97.1 | 12.58 | 12.0 |
| 1984 | 2  | 51  | 1.3  | -13.07 | -95.3 | 9.26  | 16.8 |
| 1984 | 3  | 33  | 6.2  | -9.25  | -63.1 | 10.9  | 14.2 |
| 1984 | 4  | 49  | 11.3 | -11.09 | -82.4 | 6.32  | 23.0 |
| 1984 | 5  | 115 | 14.5 | -7.67  | -53   | 8.36  | 24.5 |
| 1984 | 6  | 73  | 18.4 | -5.90  | -39   | 8.2   | 30.6 |

|      |    |     |      |        |        |       |      |
|------|----|-----|------|--------|--------|-------|------|
| 1984 | 7  | 122 | 19.5 | -6.61  | -45.1  | 7.78  | 33.3 |
| 1984 | 8  | 39  | 19.9 | -5.84  | -37.5  | 9.22  | 28.8 |
| 1984 | 9  | 113 | 16.8 | -7.24  | -46.3  | 11.62 | 13.1 |
| 1984 | 10 | 63  | 12.8 | -8.11  | -52.8  | 12.08 |      |
| 1984 | 11 | 59  | 7    | -12.18 | -88.4  | 9.04  | 13.0 |
| 1984 | 12 | 30  | 1.9  | -10.99 | -80    | 7.92  | 17.2 |
| 1985 | 1  | 40  | -3.4 | -14.82 | -113.4 | 5.16  | 15.5 |
| 1985 | 2  | 32  | -1.3 | -12.11 | -94    | 2.88  | 12.0 |
| 1985 | 3  | 78  | 6.1  | -11.39 | -88.9  | 2.22  | 15.5 |
| 1985 | 4  | 61  | 11.7 | -8.04  | -53    | 11.32 | 21.8 |
| 1985 | 5  | 119 | 17.5 | -7.53  | -52.8  | 7.44  | 24.7 |
| 1985 | 6  | 151 | 17.5 | -6.92  | -42.2  | 13.16 | 21.6 |
| 1985 | 7  | 38  | 22   | -5.93  | -33.6  | 13.84 | 25.2 |
| 1985 | 8  | 75  | 21.5 | -7.74  | -54.5  | 7.42  | 14.9 |
| 1985 | 9  | 40  | 17.8 | -6.22  | -40.5  | 9.26  | 20.4 |
| 1985 | 10 | 12  | 11.5 | -6.67  | -38.7  | 14.66 | 18.5 |
| 1985 | 11 | 115 | 4.2  | -11.29 | -79.8  | 10.52 | 10.0 |
| 1985 | 12 | 39  | 6.4  | -14.49 | -110.8 | 5.12  | 20.7 |
| 1986 | 1  | 63  | 2.1  | -13.08 | -97    | 7.64  | 20.2 |
| 1986 | 2  | 68  | -2.1 | -15.05 | -114   | 6.4   | 26.7 |
| 1986 | 3  | 52  | 4.5  | -10.55 | -81    | 3.4   | 13.0 |
| 1986 | 4  | 51  | 12.8 | -9.29  | -70    | 4.32  | 17.8 |
| 1986 | 5  | 75  | 19.2 | -6.45  | -46.5  | 5.1   | 36.6 |
| 1986 | 6  | 145 | 18.3 | -6.43  | -43.5  | 7.94  | 35.1 |
| 1986 | 7  | 66  | 20.5 | -6.30  | -40    | 10.4  | 23.0 |
| 1986 | 8  | 74  | 21.8 | -6.69  | -44    | 9.52  | 9.1  |
| 1986 | 9  | 48  | 16.2 | -5.91  | -45    | 2.28  | 17.9 |
| 1986 | 10 | 96  | 11.6 | -11.09 | -80    | 8.72  | 9.8  |
| 1986 | 11 | 8   | 7    | -9.65  | -70    | 7.2   | 14.6 |
| 1986 | 12 | 40  | 0.7  | -10.42 | -73    | 10.36 | 7.7  |
| 1987 | 1  | 42  | -1.8 | -13.74 | -102.4 | 7.52  | 15.4 |
| 1987 | 2  | 71  | 3.5  | -10.87 | -79.6  | 7.36  | 9.4  |
| 1987 | 3  | 34  | 2.8  | -10.10 | -72.4  | 8.4   | 12.1 |
| 1987 | 4  | 41  | 12.6 | -9.72  | -68.5  | 9.26  | 24.2 |
| 1987 | 5  | 84  | 14.8 | -5.82  | -35.3  | 11.26 | 34.3 |
| 1987 | 6  | 62  | 19.5 | -8.36  | -55.7  | 11.18 | 40.8 |
| 1987 | 7  | 59  | 23.2 | -6.95  | -46.2  | 9.4   | 44.1 |
| 1987 | 8  | 78  | 19.8 | -8.23  | -57.2  | 8.64  | 23.9 |
| 1987 | 9  | 96  | 20.6 | -8.33  | -57.8  | 8.84  | 19.0 |
| 1987 | 10 | 78  | 12.8 | -8.52  | -59.1  | 9.06  | 21.1 |
| 1987 | 11 | 136 | 6    | -11.47 | -83.3  | 8.46  | 13.5 |
| 1987 | 12 | 35  | 2.7  | -9.75  | -69.4  | 8.6   | 21.0 |
| 1988 | 1  | 53  | 5    | -11.53 | -87    | 5.24  | 12.8 |
| 1988 | 2  | 70  | 5    | -12.59 | -94    | 6.72  | 14.9 |
| 1988 | 3  | 76  | 6.8  | -10.75 | -80    | 6     | 18.9 |
| 1988 | 4  | 43  | 11.5 | -7.37  | -55    | 3.96  | 13.7 |
| 1988 | 5  | 41  | 16.8 |        | -68    |       | 26.1 |
| 1988 | 6  | 101 | 18.8 |        |        |       | 19.6 |
| 1988 | 7  | 31  | 23.3 | -5.49  | -31    | 12.92 | 20.1 |
| 1988 | 8  | 85  | 22   | -5.94  | -38    | 9.52  | 17.8 |
| 1988 | 9  | 96  | 17.2 | -7.02  | -46    | 10.16 | 19.8 |
| 1988 | 10 | 99  | 11.5 | -8.33  | -54    | 12.64 | 12.8 |

|      |    |       |      |        |        |       |      |
|------|----|-------|------|--------|--------|-------|------|
| 1988 | 11 | 22    | 2.6  | -14.24 | -110   | 3.92  | 18.9 |
| 1988 | 12 | 32    | 2.6  | -10.92 | -79    | 8.36  | 17.6 |
| 1989 | 1  | 41    | 0.1  |        | -110   |       | 43.3 |
| 1989 | 2  | 26    | 5.4  | -10.02 | -73    | 7.16  | 24.0 |
| 1989 | 3  | 55    | 11   | -7.52  | -53    | 7.16  | 18.3 |
| 1989 | 4  | 50    | 12.9 | -5.75  | -39    | 7     | 24.2 |
| 1989 | 5  | 106   | 15.7 | -6.00  |        |       | 25.7 |
| 1989 | 6  | 122   | 17.7 | -6.12  | -36    | 12.96 | 33.3 |
| 1989 | 7  | 135   | 21.8 | -6.32  | -39.5  | 11.06 | 24.2 |
| 1989 | 8  | 260   | 20.8 | -6.54  | -43    | 9.32  | 24.7 |
| 1989 | 9  | 80    | 16.9 | -6.38  | -38    | 13.04 | 24.6 |
| 1989 | 10 | 17    | 12.3 | -8.06  | -56    | 8.48  | 13.6 |
| 1989 | 11 | 30    | 5.5  | -12.53 | -94    | 6.24  | 14.0 |
| 1989 | 12 | 35    | 4.2  | -9.57  | -68    | 8.56  | 8.7  |
| 1990 | 1  | 25    | 1.1  | -7.87  | -60    | 2.96  | 10.1 |
| 1990 | 2  | 28    | 8.6  | -10.45 | -81.8  | 1.8   | 14.4 |
| 1990 | 3  | 68    | 11.3 | -8.09  | -58    | 6.72  | 24.5 |
| 1990 | 4  | 51    | 11.3 | -8.20  | -54.5  | 11.1  | 12.4 |
| 1990 | 5  | 10    | 17.9 | -2.11  | -10.5  | 6.38  | 18.9 |
| 1990 | 6  | 87    | 19.2 | -4.76  | -35    | 3.08  | 17.5 |
| 1990 | 7  | 46    | 21.6 | -3.93  | -29.7  | 1.74  | 28.0 |
| 1990 | 8  | 25    | 22.2 | -4.40  | -27.6  | 7.6   | 19.9 |
| 1990 | 9  | 105   | 15.8 | -7.51  | -53    | 7.08  | 13.8 |
| 1990 | 10 | 90    | 12.5 | -7.35  | -50    | 8.8   | 10.9 |
| 1990 | 11 | 102   | 6.8  | -10.37 | -76    | 6.96  | 12.5 |
| 1990 | 12 | 57    | 2.2  | -12.74 | -93.6  | 8.32  | 10.2 |
| 1991 | 1  | 40    | 2.8  | -8.79  | -64    | 6.32  | 9.9  |
| 1991 | 2  | 31    | 0.2  | -15.21 | -121   | 0.68  | 19.3 |
| 1991 | 3  | 30    | 10.2 | -8.44  | -66    | 1.52  | 18.7 |
| 1991 | 4  | 44    | 10.5 | -8.95  | -65    | 6.6   | 15.3 |
| 1991 | 5  | 122   | 13.3 | -9.89  | -76    | 3.12  | 9.3  |
| 1991 | 6  | 47    | 19.8 | -4.74  | -42    | -4.08 | 11.5 |
| 1991 | 7  | 82    | 23   | -5.79  | -41    | 5.32  | 20.3 |
| 1991 | 8  | 82    | 21.5 | -6.44  | -44    | 7.52  | 18.1 |
| 1991 | 9  | 63    | 18.4 | -6.51  | -42    | 10.08 | 13.3 |
| 1991 | 10 | 88    | 10.2 | -9.70  | -70    | 7.6   | 17.4 |
| 1991 | 11 | 146   | 7.1  | -8.82  | -65    | 5.56  | 12.1 |
| 1991 | 12 | 12    | 0.2  | -11.41 | -90    | 1.28  | 9.3  |
| 1992 | 1  | 16.3  | 2.9  | -11.43 | -84.3  | 7.14  | 9.6  |
| 1992 | 2  | 43    | 5.8  | -11.37 | -80.5  | 10.46 | 7.3  |
| 1992 | 3  | 101.7 | 8.3  | -10.30 | -72.5  | 9.9   | 9.2  |
| 1992 | 4  | 36.1  | 12.8 | -4.38  | -32.5  | 2.54  | 10.5 |
| 1992 | 5  | 21    | 17.3 | -6.04  | -41.4  | 6.92  | 11.3 |
| 1992 | 6  | 108.3 | 20.2 | -8.19  | -59.8  | 5.72  | 17.5 |
| 1992 | 7  | 58.7  | 22.5 | -2.54  | -14.5  | 5.82  | 14.8 |
| 1992 | 8  | 6.9   | 25.8 |        |        |       |      |
| 1992 | 9  | 42.5  | 18.7 | -6.54  | -41.4  | 10.92 | 14.5 |
| 1992 | 10 | 194.8 | 11.2 | -9.28  | -65.4  | 8.84  | 12.5 |
| 1992 | 11 | 112.7 | 8    | -10.85 | -75.5  | 11.3  | 8.8  |
| 1992 | 12 | 65.5  | 2.3  | -13.43 | -102.6 | 4.84  | 5.6  |
| 1993 | 1  | 8     | 3.1  | -12.08 | -85.5  | 11.14 | 15.3 |
| 1993 | 2  | 2.9   | 2.3  |        |        |       | 20.8 |

|      |    |       |      |        |        |       |      |
|------|----|-------|------|--------|--------|-------|------|
| 1993 | 3  | 25.1  | 7.2  | -9.70  | -67.3  | 10.3  | 11.9 |
| 1993 | 4  | 70    | 13   | -9.96  | -69.4  | 10.28 | 11.6 |
| 1993 | 5  | 20.9  | 19.3 |        |        |       |      |
| 1993 | 6  | 80.6  | 20.6 | -5.35  | -34    | 8.8   | 18.8 |
| 1993 | 7  | 53.4  | 21.7 | -5.00  | -31.4  | 8.6   | 28.8 |
| 1993 | 8  | 111.2 | 22.3 | -5.89  | -38.2  | 8.92  | 4.7  |
| 1993 | 9  | 152.4 | 16.5 | -7.76  | -52.5  | 9.58  | 11.7 |
| 1993 | 10 | 132.7 | 12.9 | -4.94  | -31    | 8.52  | 26.2 |
| 1993 | 11 | 176.4 | 2.9  | -13.97 | -100   | 11.76 |      |
| 1993 | 12 | 94.1  | 3.3  | -12.51 | -88.8  | 11.28 | 23.1 |
| 1994 | 1  | 31.5  | 5    | -12.40 | -93.3  | 5.9   |      |
| 1994 | 2  | 29    | 3.8  | -11.50 | -84.1  | 7.9   |      |
| 1994 | 3  | 50.8  | 11.5 | -7.80  | -55.5  | 6.9   |      |
| 1994 | 4  | 104.8 | 12.1 | -6.60  | -47.4  | 5.4   |      |
| 1994 | 5  | 68.1  | 16.9 | -5.30  | -37.4  | 5     |      |
| 1994 | 6  | 134.7 | 20.2 | -5.40  | -38    | 5.2   |      |
| 1994 | 7  | 104.4 | 23.9 | -4.70  | -30    | 7.6   |      |
| 1994 | 8  | 179.5 | 23.1 | -5.60  | -34.3  | 10.5  |      |
| 1994 | 9  | 32.2  | 19.3 | -4.50  | -25.9  | 10.1  |      |
| 1994 | 10 | 110.4 | 10.1 | -10.20 | -59.1  | 22.5  |      |
| 1994 | 11 | 32.2  | 8.9  | -9.50  | -63.3  | 12.7  |      |
| 1994 | 12 | 84.4  | 3.3  | -11.30 | -79.1  | 11.3  |      |
| 1995 | 1  | 72.6  | 1.8  | -11.90 | -85.5  | 9.7   |      |
| 1995 | 2  | 70.1  | 7.1  | -9.50  | -69.7  | 6.3   |      |
| 1995 | 3  | 70.2  | 6.5  | -11.10 | -78.7  | 10.1  |      |
| 1995 | 4  | 31.2  | 13   | -9.10  | -66    | 6.8   | 10.7 |
| 1995 | 5  | 98.4  | 16.1 | -6.50  | -42.2  | 9.8   | 16.3 |
| 1995 | 6  | 92.5  | 18.5 | -9.50  | -69.1  | 6.9   | 14.8 |
| 1995 | 7  | 91.2  | 23.8 | -5.70  | -31.9  | 13.7  | 15.2 |
| 1995 | 8  | 154.3 | 20.4 | -7.80  | -48.2  | 14.2  | 9.5  |
| 1995 | 9  | 154.9 | 15.5 | -7.20  | -46.1  | 11.5  | 4.9  |
| 1995 | 10 | 6.6   | 13.1 |        |        |       | 16.9 |
| 1995 | 11 | 40.5  | 5.7  | -13.40 | -94.5  | 12.7  | 9.2  |
| 1995 | 12 | 79.7  | 2    | -16.50 | -120.3 | 11.7  | 9.8  |
| 1996 | 1  | 80.3  | 0    | -9.54  |        |       |      |
| 1996 | 2  | 37    | 0.7  | -14.48 | -108   | 7.84  | 4.7  |
| 1996 | 3  | 10.9  | 4.6  | -8.34  |        |       |      |
| 1996 | 4  | 90.7  | 12.1 | -3.29  | -17.4  | 8.92  | 6.9  |
| 1996 | 5  | 71.2  | 17.6 | -4.14  | -33    | 0.12  | 9.9  |
| 1996 | 6  | 59    | 21.1 | -7.21  | -39.5  | 18.18 | 20.8 |
| 1996 | 7  | 58.8  | 20.2 | -3.69  | -30.3  | -0.78 | 8.0  |
| 1996 | 8  | 132.6 | 20.8 | -5.74  | -40.8  | 5.12  | 21.4 |
| 1996 | 9  | 163.9 | 13.8 | -10.16 | -72.5  | 8.78  | 11.9 |
| 1996 | 10 | 76.5  | 12.6 | -6.30  | -42.2  | 8.2   | 5.3  |
| 1996 | 11 | 114.3 | 9    | -14.41 | -105.7 | 9.58  | 7.2  |
| 1996 | 12 | 63.8  | -0.3 | -12.13 | -88.8  | 8.24  | 8.4  |
| 1997 | 1  | 59.8  | -0.3 |        |        |       | 13.0 |
| 1997 | 2  | 28    | 8    | -6.38  | -47.3  | 3.74  | 12.4 |
| 1997 | 3  | 31.5  | 8.3  | -9.72  | -70.1  | 7.66  | 6.8  |
| 1997 | 4  | 56.3  | 9.3  | -10.47 | -73.6  | 10.16 | 10.6 |
| 1997 | 5  | 69.8  | 17.9 | -7.82  | -55.1  | 7.46  | 9.4  |
| 1997 | 6  | 85.1  | 20.6 | -5.84  | -39.3  | 7.42  | 9.2  |

|      |    |       |      |        |        |       |      |
|------|----|-------|------|--------|--------|-------|------|
| 1997 | 7  | 69.7  | 21.4 | -6.45  | -42.5  | 9.1   | 14.7 |
| 1997 | 8  | 61.7  | 21.7 | -7.16  | -48.6  | 8.68  | 12.6 |
| 1997 | 9  | 25.5  | 17.9 | -8.20  | -56.6  | 9     | 8.0  |
| 1997 | 10 | 49.4  | 10.4 | -8.03  | -55    | 9.24  | 10.4 |
| 1997 | 11 | 103   | 6.7  | -10.33 | -71    | 11.64 | 4.7  |
| 1997 | 12 | 83.5  | 4.1  | -13.46 | -101.1 | 6.58  | 4.1  |
| 1998 | 1  | 16.9  | 5.1  | -14.39 | -116   | -0.88 | 7.7  |
| 1998 | 2  | 1.4   | 7.7  |        | -61.5  |       | 14.8 |
| 1998 | 3  | 59.3  | 6.5  | -8.12  | -57.5  | 7.46  | 10.8 |
| 1998 | 4  | 74.3  | 13.6 | -7.87  | -56.6  | 6.36  | 11.5 |
| 1998 | 5  | 68    | 17.1 |        |        |       | 10.5 |
| 1998 | 6  | 124   | 21.3 | -0.46  |        |       | 12.6 |
| 1998 | 7  | 143.5 | 22.4 | -6.46  | -44.5  | 7.18  | 13.6 |
| 1998 | 8  | 94.4  | 22.5 | -7.06  | -46.8  | 9.68  | 7.9  |
| 1998 | 9  | 181.2 | 16.7 | -8.61  | -57.5  | 11.38 | 6.4  |
| 1998 | 10 | 128   | 12.5 | -7.23  | -47.6  | 10.24 | 4.4  |
| 1998 | 11 | 63    | 4.8  | -11.13 | -79.9  | 9.14  | 3.6  |
| 1998 | 12 | 46.5  | -1.5 | -15.64 | -116   | 9.12  | 4.9  |
| 1999 | 1  | 44.5  | 1.7  | -13.98 | -104.2 | 7.64  | 8.1  |
| 1999 | 2  | 72.4  | 3.2  | -14.86 | -111.6 | 7.28  | 5.5  |
| 1999 | 3  | 32.7  | 9.6  | -8.66  | -66    | 3.28  | 9.6  |
| 1999 | 4  | 58.3  | 13.5 | -6.94  | -53.1  | 2.42  | 9.2  |
| 1999 | 5  | 146.2 | 17.4 | -7.06  | -52.2  | 4.28  | 10.8 |
| 1999 | 6  | 64.9  | 20.7 | -6.21  | -48.3  | 1.38  | 16.8 |
| 1999 | 7  | 146.7 | 22.4 | -5.59  | -45.3  | -0.58 | 16.3 |
| 1999 | 8  | 80.6  | 21.6 | -5.55  | -47.8  | -3.4  | 13.1 |
| 1999 | 9  | 64.8  | 19.7 | -5.13  | -41.5  | -0.46 | 5.9  |
| 1999 | 10 | 108   | 13   | -6.03  | -45.3  | 2.94  | 4.4  |
| 1999 | 11 | 75.9  | 4.6  | -15.35 | -105.4 | 17.4  | 2.3  |
| 1999 | 12 | 102.1 | 2.9  | -12.64 | -93.3  | 7.82  | 3.4  |
| 2000 | 1  | 18.8  | -0.2 | -15.25 | -115.6 | 6.4   | 7.3  |
| 2000 | 2  | 21.9  | 6.5  | -7.22  |        |       | 13.3 |
| 2000 | 3  | 51.3  | 8.9  | -5.46  | -37.8  | 5.88  | 5.8  |
| 2000 | 4  | 59.6  | 15.4 | -6.64  | -52.9  | 0.22  | 12.7 |
| 2000 | 5  | 45.5  | 18.5 | -2.28  | -25.1  | -6.86 | 8.1  |
| 2000 | 6  | 44.2  | 22.3 | -3.71  | -26.9  | 2.78  | 11.6 |
| 2000 | 7  | 84.2  | 21.5 | -9.00  | -71.1  | 0.9   | 11.7 |
| 2000 | 8  | 0.9   | 24.4 |        |        |       |      |
| 2000 | 9  | 82.1  | 17.8 | -6.92  | -49.6  | 5.76  | 9.2  |
| 2000 | 10 | 91.9  | 14.2 | -5.82  | -41.64 | 4.92  | 11.6 |
| 2000 | 11 | 112.5 | 10.5 | -6.83  | -46.82 | 7.82  | 5.3  |
| 2000 | 12 | 111.7 | 5.8  |        |        |       | 4.4  |
| 2001 | 1  | 83.8  | 4.6  | -8.28  | -61.1  | 5.14  | 5.0  |
| 2001 | 2  | 15.3  | 5.9  | -10.94 | -80.86 | 6.66  | 10.1 |
| 2001 | 3  | 100.8 | 10.9 | -9.21  | -66.24 | 7.44  | 6.7  |
| 2001 | 4  | 83.1  | 11.8 | -7.67  | -50.41 | 10.95 | 9.3  |
| 2001 | 5  | 56.1  | 18.7 | -7.08  | -53.05 | 3.59  | 15.6 |
| 2001 | 6  | 121.7 | 19.1 | -3.89  | -27.49 | 3.63  | 15.2 |
| 2001 | 7  | 54.6  | 22.9 | -5.06  | -40.62 | -0.14 | 11.0 |
| 2001 | 8  | 20.4  | 23.6 | -6.49  | -51.29 | 0.63  | 10.2 |
| 2001 | 9  | 177.3 | 15   | -9.60  | -67.3  | 9.5   | 11.9 |
| 2001 | 10 | 9.2   | 15.4 | -3.70  | -21.9  | 7.7   | 6.2  |

|      |    |       |      |        |        |       |      |
|------|----|-------|------|--------|--------|-------|------|
| 2001 | 11 | 64.5  | 4.7  | -11.40 | -79.3  | 11.9  | 5.3  |
| 2001 | 12 | 26.2  | -0.7 | -11.60 | -77.3  | 15.5  | 7.0  |
| 2002 | 1  | 25    | 2.2  | -12.90 | -93    | 10.2  | 9.4  |
| 2002 | 2  | 47    | 7.6  | -9.50  | -70.9  | 5.1   | 6.2  |
| 2002 | 3  | 36    | 10.4 | -8.90  | -69.8  | 1.4   | 2.2  |
| 2002 | 4  | 157   | 11.4 | -9.50  | -67.7  | 8.3   | 11.6 |
| 2002 | 5  | 86    | 18.4 | -5.30  | -37.2  | 5.2   | 10.7 |
| 2002 | 6  | 70    | 21.9 | -4.10  | -19.9  | 12.9  | 11.3 |
| 2002 | 7  | 148   | 22.5 | -6.40  | -39.9  | 11.3  | 13.8 |
| 2002 | 8  | 151   | 21.6 | -8.50  | -59.5  | 8.5   | 8.9  |
| 2002 | 9  | 89    | 16.1 | -8.60  | -59.1  | 9.7   | 8.1  |
| 2002 | 10 | 108   | 12.3 | -8.30  | -51.8  | 14.6  | 5.8  |
| 2002 | 11 | 76    | 10.8 | -9.90  | -68.9  | 10.3  | 5.6  |
| 2002 | 12 | 71    | 2.7  | -10.80 | -73.9  | 12.5  | 10.1 |
| 2003 | 1  | 72.1  | 0.5  | -16.50 | -119.2 | 12.8  | 6.3  |
| 2003 | 2  | 30.5  | -0.1 | -15.50 | -108.6 | 15.4  | 8.1  |
| 2003 | 3  | 8.1   | 8.9  |        | -77.5  |       | 4.6  |
| 2003 | 4  | 28.9  | 11.9 |        | -41.2  |       | 5.3  |
| 2003 | 5  | 19.8  | 20.4 | -5.24  | -35.75 | 6.13  | 12.6 |
| 2003 | 6  | 75.2  | 24.5 | -3.50  | -25.1  | 2.9   | 12.7 |
| 2003 | 7  | 78.6  | 23.6 | -3.75  | -23    | 7     | 8.6  |
| 2003 | 8  | 17.4  | 25.8 | -6.07  | -41.8  | 6.76  | 11.9 |
| 2003 | 9  | 106.6 | 17   | -7.40  | -48.6  | 10.6  | 9.2  |
| 2003 | 10 | 103.2 | 10.1 | -9.48  | -62.5  | 13.34 | 4.6  |
| 2003 | 11 | 54.4  | 9.4  | -6.65  | -42    | 11.2  | 3.0  |
| 2003 | 12 | 28.6  | 3    | -9.37  | -59.4  | 15.56 | 0.8  |
| 2004 | 1  | 63.4  | 0.8  | -14.54 | -108.8 | 7.52  | 0.8  |
| 2004 | 2  | 53.2  | 4    | -12.61 | -89.7  | 11.18 | 2.9  |
| 2004 | 3  | 67.3  | 6.7  | -10.56 | -75.9  | 8.58  | 1.8  |
| 2004 | 4  | 126   | 12.4 | -8.90  | -63.2  | 8     | 5.7  |
| 2004 | 5  | 55.5  | 15.6 | -6.31  | -45.5  | 4.98  | 11.1 |
| 2004 | 6  | 91.7  | 19.6 | -5.31  | -35    | 7.48  | 11.0 |
| 2004 | 7  | 102.5 | 21.7 | -5.16  | -36.5  | 4.78  | 11.9 |
| 2004 | 8  | 60.4  | 21.7 | -4.45  | -29.3  | 6.3   | 6.4  |
| 2004 | 9  | 81.7  | 17   | -8.42  | -59.3  | 8.06  | 4.1  |
| 2004 | 10 | 195.8 | 13.9 | -6.70  | -41.2  | 12.4  | 0.2  |
| 2004 | 11 | 45.4  | 7.7  | -10.86 | -76.5  | 10.38 | 5.6  |
| 2004 | 12 | 50    | 2.9  | -10.28 | -71    | 11.24 | 3.1  |
| 2005 | 1  | 22    | 2    | -17.57 | -133.1 | 7.46  | 3.9  |
| 2005 | 2  | 71.7  | -0.1 | -16.26 | -118.3 | 11.78 | 6.4  |
| 2005 | 3  | 47.9  | 6.8  | -12.02 | -85.9  | 10.26 | 9.3  |
| 2005 | 4  | 62.2  | 12.7 | -6.39  | -45.6  | 5.52  | 8.7  |
| 2005 | 5  | 73.1  | 17.5 | -6.10  | -41.4  | 7.4   | 9.0  |
| 2005 | 6  | 68.1  | 20.4 | -5.46  | -37.9  | 5.78  | 17.0 |
| 2005 | 7  | 164.4 | 22.1 | -7.39  | -49.8  | 9.32  | 14.0 |
| 2005 | 8  | 175.7 | 19.2 | -5.89  | -39.3  | 7.82  | 11.8 |
| 2005 | 9  | 72    | 17.5 | -9.57  | -67.1  | 9.46  | 10.4 |
| 2005 | 10 | 31.7  | 13.1 | -7.54  | -51.5  | 8.82  | 11.8 |
| 2005 | 11 | 86.9  | 6    | -12.84 | -86.7  | 16.02 | 7.7  |
| 2005 | 12 | 112.4 | 2.6  | -13.13 | -93.9  | 11.14 | 5.7  |
| 2006 | 1  | 39.4  | -0.1 | -12.14 | -89.1  | 8.02  | 5.8  |
| 2006 | 2  | 42.3  | 2.8  | -10.42 | -74.6  | 8.76  | 10.8 |

|      |    |       |      |        |         |       |      |
|------|----|-------|------|--------|---------|-------|------|
| 2006 | 3  | 56.4  | 6.4  | -11.39 | -84.5   | 6.62  | 5.2  |
| 2006 | 4  | 110.9 | 13.5 | -8.01  | -53.7   | 10.38 | 10.1 |
| 2006 | 5  | 84.6  | 16.7 | -8.74  | -63.1   | 6.82  | 10.9 |
| 2006 | 6  | 36.7  | 21.2 | -6.69  | -55.1   | -1.58 | 14.0 |
| 2006 | 7  | 38.3  | 24.6 | -3.85  | -30.5   | 0.3   | 11.4 |
| 2006 | 8  | 183.8 | 19.3 | -7.44  | -51.5   | 8.02  | 9.2  |
| 2006 | 9  | 63.2  | 18.8 | -6.10  | -38.9   | 9.9   | 4.7  |
| 2006 | 10 | 17.8  | 14.6 | -6.03  | -38.8   | 9.44  | 5.5  |
| 2006 | 11 | 46.4  | 9.9  | -9.31  | -65     | 9.48  | 7.7  |
| 2006 | 12 | 34.1  | 5.2  | -9.74  | -66.1   | 11.82 | 6.6  |
| 2007 | 1  | 62.8  | 7.5  |        |         |       | 2.6  |
| 2007 | 2  | 42.2  | 8.1  |        |         |       | 3.2  |
| 2007 | 3  | 75    | 10.2 |        |         |       | 5.9  |
| 2007 | 4  | 4.2   | 15.9 |        |         |       | 8.1  |
| 2007 | 5  | 64.6  | 18.8 |        |         |       | 9.7  |
| 2007 | 6  | 86.1  | 22.7 |        |         |       | 15.4 |
| 2007 | 7  | 66.5  | 23.8 |        |         |       | 6.5  |
| 2007 | 8  | 109.7 | 22   |        |         |       | 10.4 |
| 2007 | 9  | 160.2 | 15.5 |        |         |       | 7.7  |
| 2007 | 10 | 109.7 | 11.2 |        |         |       |      |
| 2007 | 11 | 57.5  | 6    |        |         |       | 19.5 |
| 2007 | 12 | 57.4  | 1.4  |        |         |       | 14.6 |
| 2008 | 1  | 8.2   | 3.8  |        |         |       | 7.7  |
| 2008 | 2  | 9.1   | 6.8  |        |         |       | 16.2 |
| 2008 | 3  | 104.5 | 8.2  |        |         |       | 6.5  |
| 2008 | 4  | 33.9  | 13   |        |         |       | 9.5  |
| 2008 | 5  | 48.1  | 18.2 |        |         |       | 11.9 |
| 2008 | 6  | 123.5 | 21.6 |        |         |       | 14.3 |
| 2008 | 7  | 92    | 22.8 |        |         |       | 12.1 |
| 2008 | 8  | 58.3  | 22.5 |        |         |       | 3.5  |
| 2008 | 9  | 48.3  | 16.4 |        |         |       | 9.1  |
| 2008 | 10 | 69.7  | 14   |        |         |       | 6.3  |
| 2008 | 11 | 75.8  | 8.8  |        |         |       | 5.8  |
| 2008 | 12 | 97.1  | 4.3  |        |         |       | 6.1  |
| 2009 | 1  | 88    | 0    |        |         |       | 5.7  |
| 2009 | 2  | 38.9  | 4.1  |        |         |       |      |
| 2009 | 3  | 43.4  | 8.4  |        |         |       | 8.1  |
| 2009 | 4  | 66.3  | 15.8 |        |         |       | 13.6 |
| 2009 | 5  | 27.5  | 19.2 |        |         |       | 8.8  |
| 2009 | 6  | 82    | 20.2 |        |         |       | 15.7 |
| 2009 | 7  | 80.1  | 23.2 |        |         |       | 13.3 |
| 2009 | 8  | 97.3  | 23.6 |        |         |       | 9.3  |
| 2009 | 9  | 28.3  | 19.7 |        |         |       | 10.8 |
| 2009 | 10 | 72.2  | 12.7 |        |         |       | 8.4  |
| 2009 | 11 | 87.8  | 9.3  |        |         |       | 5.4  |
| 2009 | 12 | 83.1  | 4.1  |        |         |       | 5.6  |
| 2010 | 1  | 86.1  | 0.3  | -11.11 | -79.01  | 9.87  | 4.2  |
| 2010 | 2  | 74.9  | 3.6  | -14.44 | -106.28 | 9.24  | 6.5  |
| 2010 | 3  | 60.3  | 7.8  | -10.93 | -79.39  | 8.05  | 5.3  |
| 2010 | 4  | 65.7  | 13.3 | -10.13 | -72.58  | 8.46  | 7.7  |
| 2010 | 5  | 124   | 16.7 | -8.73  | -68.98  | 0.86  | 14.0 |
| 2010 | 6  | 90.1  | 21   | -8.89  | -62.81  | 8.31  | 14.1 |

|      |    |       |      |        |         |       |      |
|------|----|-------|------|--------|---------|-------|------|
| 2010 | 7  | 122   | 24.1 | -7.52  | -53.31  | 6.85  | 10.7 |
| 2010 | 8  | 113.9 | 21.7 | -7.73  | -53.02  | 8.82  | 10.5 |
| 2010 | 9  | 192.8 | 15.9 | -8.10  | -53.2   | 11.6  | 6.2  |
| 2010 | 10 | 38.9  | 10.6 | -7.02  | -45.3   | 10.86 | 6.8  |
| 2010 | 11 | 119.7 | 9.9  | -11.80 | -82.4   | 12    | 4.1  |
| 2010 | 12 | 66.7  | 1.7  | -13.16 | -94.2   | 11.08 | 4.7  |
| 2011 | 1  | 13.6  | 3.1  |        |         |       | 7.6  |
| 2011 | 2  | 13.3  | 2.9  |        |         |       | 7.6  |
| 2011 | 3  | 39.6  | 8.6  |        |         |       | 7.2  |
| 2011 | 4  | 40.5  | 14.9 |        |         |       | 12.8 |
| 2011 | 5  | 37.1  | 18   |        |         |       | 14.0 |
| 2011 | 6  | 85.3  | 21.6 |        |         |       | 14.7 |
| 2011 | 7  | 75    | 22.9 |        |         |       | 12.4 |
| 2011 | 8  | 16.4  | 24.3 |        |         |       | 8.0  |
| 2011 | 9  | 57.3  | 21.4 |        |         |       | 6.6  |
| 2011 | 10 | 72    | 11.7 |        |         |       | 5.8  |
| 2011 | 11 | 0.7   | 4.3  |        |         |       | 11.5 |
| 2011 | 12 | 70    | 4.8  |        |         |       | 3.9  |
| 2012 | 1  | 17.3  | 3.8  | -8.35  | -60.59  | 6.21  | 5.6  |
| 2012 | 2  | 42.2  | -0.2 | -16.57 | -122.12 | 10.44 | 7.1  |
| 2012 | 3  | 4.3   | 11.5 | -1.80  | -19.19  | -4.79 |      |
| 2012 | 4  | 45.6  | 13.3 | -4.96  | -34.92  | 4.76  | 7.9  |
| 2012 | 5  | 89.8  | 17.5 | -4.63  | -33.23  | 3.81  | 10.7 |
| 2012 | 6  | 144   | 22.9 | -5.32  | -37.26  | 5.3   | 8.5  |
| 2012 | 7  | 39.8  | 25   |        |         |       |      |
| 2012 | 8  | 14.7  | 25.4 |        |         |       | 7.5  |
| 2012 | 9  | 131.1 | 18.9 |        |         |       | 6.5  |
| 2012 | 10 | 96.3  | 12.9 | -9.90  | -68.81  | 10.39 | 4.8  |
| 2012 | 11 | 111.1 | 10   | -9.63  | -67.36  | 9.68  | 3.8  |
| 2012 | 12 | 76.5  | 2.8  | -11.25 | -83.82  | 6.18  | 4.7  |
| 2013 | 1  | 147.7 | 2.4  | -12.04 | -88.37  | 7.95  | 7.0  |
| 2013 | 2  | 104.8 | 2.7  | -13.73 | -99.63  | 10.21 | 5.5  |
| 2013 | 3  | 126.2 | 5.8  | -11.22 | -83.34  | 6.42  | 6.0  |
| 2013 | 4  | 51.3  | 14.1 | -8.45  | -61.89  | 5.71  | 10.9 |
| 2013 | 5  | 113   | 16.8 | -7.10  | -48.74  | 8.06  | 10.0 |
| 2013 | 6  | 71.4  | 20.8 | -7.61  | -56.74  | 4.14  | 14.6 |
| 2013 | 7  | 32.3  | 24.5 |        |         |       | 18.3 |
| 2013 | 8  | 111.4 | 23.8 | -6.12  | -38.09  | 10.87 | 9.3  |
| 2013 | 9  | 118   | 16.8 | -7.78  | -52.56  | 9.68  | 6.1  |
| 2013 | 10 | 23.6  | 14.3 |        |         |       | 6.3  |
| 2013 | 11 | 180.5 | 8.1  | -8.71  | -57.28  | 12.4  | 3.3  |
| 2013 | 12 | 12.2  | 4.4  |        |         |       | 4.9  |
| 2014 | 1  | 52.2  | 6.2  | -10.80 | -79.75  | 6.65  | 6.4  |
| 2014 | 2  | 130   | 6.1  | -9.67  | -69.37  | 7.99  | 5.3  |
| 2014 | 3  | 22.7  | 11.9 | -7.84  | -58.65  | 4.07  | 5.8  |
| 2014 | 4  | 71.3  | 14.1 | -5.81  | -38.60  | 7.88  | 9.6  |
| 2014 | 5  | 104   | 16.3 | -7.35  | -58.41  | 0.39  | 12.8 |
| 2014 | 6  | 137.2 | 21.1 | -3.77  | -22.93  | 7.23  | 11.1 |
| 2014 | 7  | 94.8  | 22.4 | -7.83  | -56.02  | 6.62  | 11.4 |
| 2014 | 8  | 120.7 | 20.9 | -5.61  | -35.23  | 9.65  | 4.0  |
| 2014 | 9  | 207.7 | 16.9 | -9.05  | -62.05  | 10.35 | 8.8  |
| 2014 | 10 | 126.5 | 14.4 | -7.59  | -54.32  | 6.4   | 4.7  |

|      |    |       |      |        |         |       |      |
|------|----|-------|------|--------|---------|-------|------|
| 2014 | 11 | 90.9  | 9.8  | -5.84  | -35.32  | 11.4  | 3.6  |
| 2014 | 12 | 75.8  | 5.4  | -13.28 | -94.49  | 11.75 | 5.2  |
| 2015 | 1  | 51.2  | 4.3  | -12.30 | -92.30  | 6.1   | 6.4  |
| 2015 | 2  | 61.5  | 3.6  | -12.15 | -90.63  | 6.57  | 5.3  |
| 2015 | 3  | 22.8  | 9    | -7.31  | -56.97  | 1.51  | 5.8  |
| 2015 | 4  | 24.4  | 12.9 | -5.28  | -42.37  | -0.13 | 9.6  |
| 2015 | 5  | 121.5 | 18.3 | -4.95  | -33.39  | 6.21  | 12.8 |
| 2015 | 6  | 64.6  | 21.6 |        |         |       | 11.1 |
| 2015 | 7  | 74.4  | 25.4 | -2.96  | -19.48  | 4.2   | 11.4 |
| 2015 | 8  | 75.2  | 24.1 | -8.56  | -59.55  | 8.93  | 9.9  |
| 2015 | 9  | 95.6  | 18.3 | -7.08  | -45.19  | 11.45 | 7.2  |
| 2015 | 10 | 191.7 | 12   | -10.37 | -73.19  | 9.77  | 4.3  |
| 2015 | 11 | 40.7  | 9.9  | -15.60 | -113.86 | 10.94 | 3.4  |
| 2015 | 12 | 0.3   | 4.8  |        |         |       |      |
| 2016 | 1  | 67.9  | 3    | -13.23 | -95.39  | 10.45 | 4.7  |
| 2016 | 2  | 119.8 | 7.4  | -11.58 | -88.25  | 4.39  | 4.7  |
| 2016 | 3  | 45.4  | 8.8  | -14.64 | -109.36 | 7.76  | 7.7  |
| 2016 | 4  | 47.6  | 13.8 | -7.60  | -52.54  | 8.26  | 10.4 |
| 2016 | 5  | 101.6 | 16.7 | -3.86  | -23.91  | 6.97  | 9.8  |
| 2016 | 6  | 138.5 | 21.5 | -7.81  | -55.73  | 6.75  | 9.1  |
| 2016 | 7  | 51.6  | 24.2 | -3.34  | -30.04  | -3.32 |      |
| 2016 | 8  | 48.2  | 21.8 | -6.96  | -48.35  | 7.33  | 8.8  |
| 2016 | 9  | 43.2  | 19.7 | -8.32  | -58.06  | 8.5   | 8.1  |
| 2016 | 10 | 102   | 11.2 | -8.30  | -56.11  | 10.29 | 5.5  |
| 2016 | 11 | 85.9  | 8    | -9.19  | -61.77  | 11.75 | 4.5  |
| 2016 | 12 | 2.1   | 1    |        |         |       |      |
| 2017 | 1  | 31.6  | -2.3 | -11.92 | -96.65  | -1.29 |      |
| 2017 | 2  | 42.8  | 6.2  |        |         |       | 5.9  |
| 2017 | 3  | 14.7  | 11.8 | -8.57  | -65.82  | 2.74  | 3.1  |
| 2017 | 4  | 47.9  | 13.3 | -6.62  | -44.80  | 8.16  | 8.6  |
| 2017 | 5  | 35.6  | 18.5 | -6.88  | -50.55  | 4.49  | 8.6  |
| 2017 | 6  | 99.9  | 23.5 | -3.42  | -21.55  | 5.81  | 8.8  |
| 2017 | 7  | 53.4  | 25   | -8.79  | -62.89  | 7.43  | 9.7  |
| 2017 | 8  | 53.7  | 24.8 | -4.93  | -33.23  | 6.21  | 8.8  |
| 2017 | 9  | 236.1 | 15.9 | -6.33  | -39.40  | 11.24 | 6.2  |
| 2017 | 10 | 69.3  | 13.3 | -6.12  | -38.70  | 10.26 | 5.5  |
| 2017 | 11 | 112.8 | 8.2  | -13.19 | -88.60  | 16.92 | 4.3  |
| 2017 | 12 | 90.7  | 4.9  | -11.75 | -83.10  | 10.9  | 6.0  |
| 2018 | 1  | 55.7  | 6.3  | -8.25  | -57.6   | 8.4   | 3.3  |
| 2018 | 2  | 102.3 | 0.9  | -14.87 | -107.1  | 11.86 | 6.8  |
| 2018 | 3  | 72.6  | 5.8  | -12.21 | -89.6   | 8.08  | 5.6  |
| 2018 | 4  | 59.5  | 17.3 | -6.24  | -46.4   | 3.52  | 9.4  |
| 2018 | 5  | 108.3 | 20.4 | -9.26  | -62.6   | 11.48 | 13.6 |
| 2018 | 6  | 66.6  | 22.4 | -5.45  | -35.8   | 7.8   | 13.7 |
| 2018 | 7  | 102.1 | 23.6 | -9.05  | -60     | 12.4  | 16.4 |
| 2018 | 8  | 44.3  | 25   | -6.49  | -40.2   | 11.72 | 15.3 |
| 2018 | 9  | 54.6  | 19.2 | -6.62  | -42.7   | 10.26 | 6.9  |
| 2018 | 10 | 65.6  | 15   | -6.58  | -41.2   | 11.44 | 5.0  |
| 2018 | 11 | 77.5  | 8.8  | -10.89 | -73     | 14.12 | 4.8  |
| 2018 | 12 | 17.5  | 4.2  | -12.12 | -90.7   | 6.26  | 3.1  |

data do not exist

data not taken into evaluation
