# Supplementary material
Source: MDPI journal article supplement (https://www.mdpi.com/2073-4441/12/1/226)
Supplement: s1 [file s1]

| description         | year | $\delta^{18}\text{O}_a$<br>(‰) | $\delta^2\text{H}_a$<br>(‰) | $d_a$ (‰) | $\delta^{18}\text{O}_{w.m.}$<br>(‰) | $\delta^2\text{H}_{w.m.}$<br>(‰) | $d_{w.m.}$ (‰) | A ( $^3\text{H}$ )<br>mean<br>(TU) |
|---------------------|------|--------------------------------|-----------------------------|-----------|-------------------------------------|----------------------------------|----------------|------------------------------------|
|                     | 1976 |                                |                             |           |                                     |                                  |                | 100.5                              |
| location 1          | 1977 |                                |                             |           |                                     |                                  |                | 79.4                               |
|                     | 1978 |                                |                             |           |                                     |                                  |                | 73.8                               |
| Zagreb              | 1979 |                                |                             |           |                                     |                                  |                | 36.8                               |
| stable isotopes     | 1980 | -8.97                          | -63.78                      | 7.96      | -8.92                               | -62.65                           | 8.86           | 39.5                               |
| until 1995          | 1981 | -9.37                          | -66.64                      | 8.29      | -9.44                               | -67.32                           | 8.2            | 38.3                               |
| tritium until 1993  | 1982 | -8.58                          | -60.42                      | 8.24      | -8.31                               | -59.21                           | 7.27           | 25.1                               |
| Puntijarka for 1995 | 1983 | -8.37                          | -60.33                      | 6.64      | -9.07                               | -65.22                           | 7.35           | 25.8                               |
|                     | 1984 | -9.31                          | -65.00                      | 9.44      | -9.25                               | -64.24                           | 9.75           | 20.6                               |
|                     | 1985 | -9.43                          | -66.85                      | 8.58      | -9.12                               | -66.85                           | 8.84           | 18.4                               |
| Zagreb - Grič       | 1986 | -9.24                          | -67.00                      | 6.94      | -8.96                               | -64.45                           | 7.2            | 19.3                               |
| stable isotopes     | 1987 | -9.32                          | -65.58                      | 9.00      | -9.21                               | -64.64                           | 9.04           | 23.2                               |
| and tritium         | 1988 | -9.42                          | -67.45                      | 7.89      | -7.29                               | -55.17                           | 6.9            | 17.8                               |
| after 1996          | 1989 | -7.71                          | -59.05                      | 2.63      | -6.54                               | -43.23                           | 8.46           | 23.2                               |
|                     | 1990 | -7.32                          | -52.48                      | 6.04      | -7.81                               | -56.12                           | 6.44           | 16.1                               |
|                     | 1991 | -8.72                          | -65.50                      | 4.29      | -8.37                               | -61.94                           | 5.06           | 14.5                               |
|                     | 1992 | -8.58                          | -60.95                      | 7.67      | -8.96                               | -63.54                           | 8.11           | 11.1                               |
|                     | 1993 | -8.72                          | -59.81                      | 9.92      | -8.48                               | -58.22                           | 9.65           | 17.3                               |
|                     | 1994 | -7.90                          | -53.95                      | 9.25      | -7.2                                | -48.02                           | 9.59           |                                    |
|                     | 1995 | -9.84                          | -68.38                      | 10.31     | -9.15                               | -62.49                           | 10.74          | 11.9                               |
|                     | 1996 | -8.29                          | -62.28                      | 4.00      | -8.3                                | -52.46                           | 6.79           | 10.5                               |
|                     | 1997 | -8.53                          | -60.02                      | 8.24      | -8.02                               | -56.33                           | 7.85           | 9.7                                |
|                     | 1998 | -8.70                          | -63.21                      | 6.37      | -6.87                               | -47.38                           | 7.21           | 9.1                                |
|                     | 1999 | -9.00                          | -67.83                      | 4.17      | -8.55                               | -64.53                           | 3.89           | 8.8                                |
|                     | 2000 | -6.91                          | -53.78                      | 1.53      | -5.54                               | -39.68                           | 2.28           | 9.2                                |
|                     | 2001 | -7.91                          | -56.41                      | 6.88      | -7.97                               | -56.68                           | 7.1            | 9.5                                |
|                     | 2002 | -8.56                          | -59.30                      | 9.17      | -8.21                               | -56.03                           | 9.65           | 8.6                                |
|                     | 2003 | -8.35                          | -57.05                      | 9.71      | -7.74                               | -55.29                           | 9.56           | 7.3                                |
|                     | 2004 | -8.68                          | -60.99                      | 8.41      | -8.12                               | -60.99                           | 8.41           | 5.4                                |
|                     | 2005 | -10.01                         | -70.88                      | 9.23      | -9.22                               | -64.38                           | 9.4            | 9.7                                |
|                     | 2006 | -8.32                          | -59.24                      | 7.33      | -8.23                               | -58.1                            | 7.76           | 8.5                                |
|                     | 2007 |                                |                             |           |                                     |                                  |                | 9.5                                |
|                     | 2008 |                                |                             |           |                                     |                                  |                | 9.1                                |
|                     | 2009 |                                |                             |           |                                     |                                  |                | 9.5                                |
|                     | 2010 | -9.96                          | -70.87                      | 8.81      | -9.67                               | -68.6                            | 8.76           | 7.9                                |
|                     | 2011 |                                |                             |           |                                     |                                  |                | 9.4                                |
|                     | 2012 | -8.05                          | -58.59                      | 5.78      | -6.33                               | -45.22                           | 5.41           | 6.7                                |
|                     | 2013 | -9.20                          | -65.18                      | 8.38      | -8.77                               | -61.82                           | 8.37           | 8.5                                |
|                     | 2014 | -7.87                          | -55.43                      | 7.53      | -7.69                               | -53.64                           | 7.9            | 7.4                                |
|                     | 2015 | -8.66                          | -62.69                      | 6.56      | -7.81                               | -55.35                           | 7.16           | 7.9                                |
|                     | 2016 | -8.40                          | -61.22                      | 6.00      | -8.54                               | -61                              | 7.3            | 7.3                                |
|                     | 2017 | -8.05                          | -56.84                      | 7.53      | -7.44                               | -50.4                            | 9.14           | 6.8                                |
|                     | 2018 | -9.00                          | -62.24                      | 9.78      | -9.27                               | -63.85                           | 10.33          | 8.7                                |
