# Supplementary material
Source: MDPI journal article supplement (https://www.mdpi.com/2073-4441/12/1/226)
Supplement: s1 [file s1]

**Table S1.** Stations from Croatia with available data on isotopes in precipitation.

| No. <sup>1</sup> | Name of site                  | WMO<br>Code <sup>2</sup> | Altitude<br>(m asl) | Climate<br>Zone <sup>3</sup> | Start<br>Year | End<br>Year | No. <sup>4</sup><br>$\delta^{18}\text{O}$ | No. <sup>4</sup><br>$\delta^2\text{H}$ | No. <sup>4</sup><br>$A(^3\text{H})$ | Measured<br>at <sup>5</sup> | Ref.              |
|------------------|-------------------------------|--------------------------|---------------------|------------------------------|---------------|-------------|-------------------------------------------|----------------------------------------|-------------------------------------|-----------------------------|-------------------|
| 1                | Zagreb                        | 1312701                  | 165                 | Cfb                          | 1975          | 1995        | 183                                       | 183                                    | 232                                 | JSI, RBI                    | [47,62,63]        |
| 1                | Zagreb – Grič                 | 1312702                  | 157                 | Cfb                          | 1996          | 2003        | 89                                        | 92                                     | 95                                  | JSI, RBI                    | [47,62,63]        |
|                  |                               |                          |                     |                              | 2004          | 2018        |                                           |                                        | 174                                 | RBI                         | present           |
|                  |                               |                          |                     |                              | 2004          | 2006        | 36                                        | 36                                     |                                     | SILab                       | present           |
|                  |                               |                          |                     |                              | 2010          | 2010        | 12                                        | 12                                     | 12                                  | HAS, RBI                    | [66]              |
|                  |                               |                          |                     |                              | 2012          | 2018        | 74                                        | 74                                     |                                     | FMGPE                       | present           |
| 1                | Puntijarka, Mt.<br>Medvednica |                          | 988                 | Dfb/Csb                      |               |             |                                           |                                        | 20                                  | RBI                         | [62]              |
| 2                | Malinska, Krk<br>Island       | 1431801                  |                     | Cfa                          | 2000          | 2002        | 11                                        | 11                                     | 10                                  | JSI, RBI                    | [47]              |
| 3                | Zavižan, Mt.<br>Velebit       | 1432401                  | 1594                | Dfc                          | 2000          | 2003        | 39                                        | 39                                     | 38                                  | JSI, RBI                    | [47]              |
| 4                | Gacka,<br>Tonkovića           |                          | 457                 | Cfb                          | 2005          | 2006        | 10                                        | 10                                     | 13                                  | SILab, RBI                  | [65,68]           |
| 5                | Plitvice Lakes                | 1432501                  | 550                 | Cfb                          | 1978          | 1984        | -                                         | -                                      | 27                                  | RBI                         | [62]              |
|                  |                               |                          |                     |                              | 2004          | 2005        | 18                                        | 18                                     |                                     | IAEA                        | [67]              |
|                  |                               |                          |                     |                              | 2003          | 2006        |                                           |                                        | 38                                  | RBI                         | [63]              |
| 6                | Ličko Lešće                   | 1322301                  | 463                 | Cfb                          | 2008          |             | 11                                        | 11                                     | -                                   | SILab                       | [27] <sup>6</sup> |
| 7                | Gospić                        | 1322300                  | 564                 | Cfb                          | 2008          |             | 12                                        | 12                                     |                                     | SILab                       | [27] <sup>6</sup> |
| 8                | Zadar                         | 1429001                  | 5                   | Cfa/Csa                      | 2000          | 2003        | 36                                        | 39                                     | 39                                  | JSI, RBI                    | [47]              |
| 9                | Biograd na<br>Moru            |                          | 2                   | Csa                          | 2005          | 2006        | 10                                        | 10                                     | 11                                  | SILab, RBI                  | [65]              |
| 10               | Dugopolje                     | 1333401                  | 295                 | Csa                          | 2008          | 2009        | 11                                        | 11                                     | 9                                   | SILab, RBI                  | [27] <sup>6</sup> |
| 11               | Komiža, Vis<br>Island         | 1444101                  | 6                   | Csa                          | 2000          | 2003        | 37                                        | 38                                     | 35                                  | JSI, RBI                    | [47]              |
| 12               | Dubrovnik                     | 1447301                  | 52                  | Cfa/Csa                      | 2000          | 2003        | 37                                        | 39                                     | 34                                  | JSI, RBI                    | [47]              |

1. location numbers refer to numbers in Figure 1

2. WMO/GNIP code of the station, if data is included/available in GNIP

3. Köppen climate class (Cfa – temperate climate without dry season and with hot summer; Cfb - temperate climate without dry season and with warm summer; Csa - temperate climate with dry and hot summer ; Dfb – cold climate without dry season and with warm summer, Dfc – cold climate without dry season and with cold summer(Köppen, 1937, Peel et al., 2007)); changes in climate class according to Nimac and Perčec Tadić 2016

4. number of data

5. JSI – Jožef Stefan Institute, Ljubljana, Slovenia

RBI – Ruđer Bošković Institute, Zagreb, Croatia

- IAEA – Isotope Hydrology Laboratory, International Atomic Energy Agency, Vienna
- SILab - Stable Isotope Laboratory at the Physics Department, School of Medicine, University of Rijeka, Rijeka, Croatia
- HAS - Institute for Geochemical Research, Hungarian Academy of Sciences, Budapest, Hungary
- FMGEP Faculty of Mining, Geology and Petroleum Engineering, University of Zagreb
6. available on GNIP database, not published elsewhere
