# Supplementary material
Source: MDPI journal article supplement (https://www.mdpi.com/2073-4441/12/1/226)

Supplementary material:

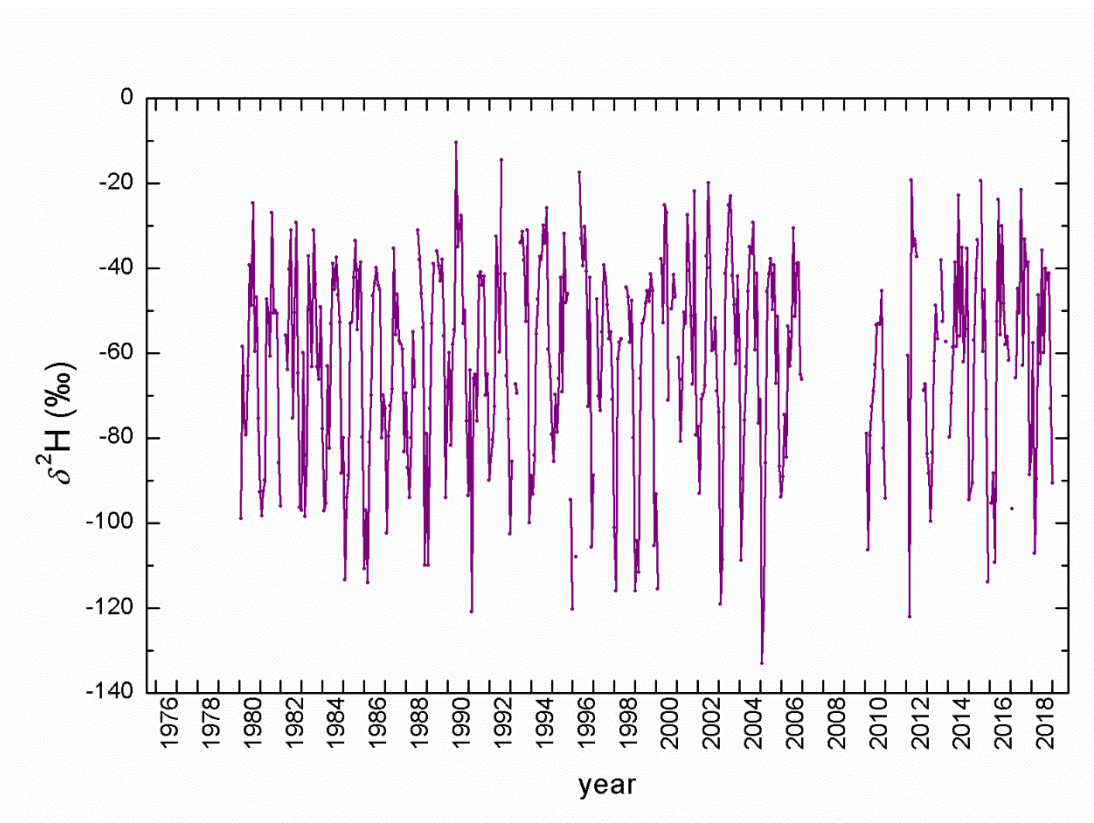

**Figure S1.** Monthly  $\delta^2\text{H}$  in precipitation at Zagreb, 1980 – 2018, with a gap 2007 – 2009 and 2011.

Supplement: s1 [file s1]
